# Supplementary material for: Quantification of gene expression patterns to reveal the origins of abnormal morphogenesis
Source: eLife. 2018 Sep 20;7:e36405. doi: 10.7554/eLife.36405 (PMC6199133; doi:10.7554/eLife.36405)
Supplement: Figure 4—source data 1. — Table containing the individual scores obtained from the staging system and used to produce the graph in Figure 4. [file elife-36405-fig4-data1.xlsx]

## Sheet: Figure 4
id	genotype	litter	litter dev	days	hours	total number hours
9_DUSP6_10.5_WT_LFL	WT	Litter 1	EARLY	10	3	243
9_DUSP6_10.5_WT_RFL	WT	Litter 1	EARLY	10	5	245
9_DUSP6_10.5_WT_LHL	WT	Litter 1	EARLY	10	5	245
9_DUSP6_10.5_WT_RHL	WT	Litter 1	EARLY	10	5	245
10_DUSP6_10.5_WT_LFL	WT	Litter 1	EARLY	10	7	247
10_DUSP6_10.5_WT_RFL	WT	Litter 1	EARLY	10	2	242
10_DUSP6_10.5_WT_LHL	WT	Litter 1	EARLY	10	8	248
10_DUSP6_10.5_WT_RHL	WT	Litter 1	EARLY	10	7	247
11_DUSP6_10.5_WT_LFL	WT	Litter 1	EARLY	10	4	244
11_DUSP6_10.5_WT_RFL	WT	Litter 1	EARLY	10	5	245
11_DUSP6_10.5_WT_LHL	WT	Litter 1	EARLY	10	5	245
12_DUSP6_10.5_WT_RFL	WT	Litter 1	EARLY	10	6	246
12_DUSP6_10.5_WT_LHL	WT	Litter 1	EARLY	10	6	246
13_DUSP6_10.5_WT_RHL	WT	Litter 1	EARLY	10	9	249
14_DUSP6_10.5_WT_LFL	WT	Litter 1	EARLY	10	6	246
14_DUSP6_10.5_WT_RFL	WT	Litter 1	EARLY	10	7	247
14_DUSP6_10.5_WT_LHL	WT	Litter 1	EARLY	10	5	245
15_DUSP6_10.5_MUT_LHL	MUT	Litter 1	EARLY	10	6	246
15_DUSP6_10.5_MUT_RHL	MUT	Litter 1	EARLY	10	8	248
16_DUSP6_10.5_MUT_LFL	MUT	Litter 1	EARLY	10	7	247
16_DUSP6_10.5_MUT_RFL	MUT	Litter 1	EARLY	10	8	248
16_DUSP6_10.5_MUT_RHL	MUT	Litter 1	EARLY	10	7	247
17_DUSP6_10.5_MUT_LFL	MUT	Litter 1	EARLY	10	8	248
17_DUSP6_10.5_MUT_RFL	MUT	Litter 1	EARLY	10	8	248
17_DUSP6_10.5_MUT_LHL	MUT	Litter 1	EARLY	10	7	247
17_DUSP6_10.5_MUT_RHL	MUT	Litter 1	EARLY	10	5	245
18_DUSP6_2.5_MUT_RFL	MUT	Litter 1	EARLY	10	5	245
18_DUSP6_10.5_MUT_LHL	MUT	Litter 1	EARLY	10	5	245
18_DUSP6_10.5_MUT_RHL	MUT	Litter 1	EARLY	10	5	245
8_DUSP6_11.5_WT_LFL	WT	Litter 2	EARLY	10	5	245
8_DUSP6_11.5_WT_RFL	WT	Litter 2	EARLY	10	5	245
8_DUSP6_11.5_WT_LHL	wt	Litter 2	EARLY	10	5	245
8_DUSP6_11.5_WT_RHL	wt	Litter 2	EARLY	10	5	245
9_DUSP6_11.5_WT_LFL	WT	Litter 2	EARLY	10	7	247
9_DUSP6_11.5_WT_RFL	WT	Litter 2	EARLY	10	5	245
9_DUSP6_11.5_WT_LHL	wt	Litter 2	EARLY	10	5	245
9_DUSP6_11.5_WT_RHL	wt	Litter 2	EARLY	10	5	245
10_DUSP6_11.5_WT_RFL	WT	Litter 2	EARLY	10	6	246
10_DUSP6_11.5_WT_LFL	WT	Litter 2	EARLY	10	6	246
11_DUSP6_11.5_WT_LFL	WT	Litter 2	EARLY	10	7	247
11_DUSP6_11.5_WT_RFL	WT	Litter 2	EARLY	10	8	248
11_DUSP6_11.5_WT_LHL	WT	Litter 2	EARLY	10	5	245
11_DUSP6_11.5_WT_RHL	WT	Litter 2	EARLY	10	5	245
14_DUSP6_11.5_WT_LHL	WT	Litter 2	EARLY	10	6	246
16_DUSP6_11.5_MUT_LHL	MUT	Litter 2	EARLY	10	5	245
17_DUSP6_11.5_MUT_RHL	MUT	Litter 2	EARLY	10	5	245
5_DUSP6_10.5_WT_LFL	WT	Litter 3	MID	10	15	255
5_DUSP6_10.5_WT_RFL	WT	Litter 3	MID	10	6	246
5_DUSP6_10.5_WT_LHL	WT	Litter 3	MID	10	14	254
5_DUSP6_10.5_WT_RHL	WT	Litter 3	MID	10	13	253
6_DUSP6_10.5_WT_LFL	WT	Litter 3	MID	10	17	257
6_DUSP6_10.5_WT_RFL	WT	Litter 3	MID	10	8	248
6_DUSP6_10.5_WT_LHL	WT	Litter 3	MID	10	20	260
6_DUSP6_10.5_WT_RHL	WT	Litter 3	MID	10	16	256
7_DUSP6_10.5_WT_LFL	WT	Litter 3	MID	10	10	250
7_DUSP6_10.5_WT_RFL	WT	Litter 3	MID	10	15	255
7_DUSP6_10.5_WT_LHL	WT	Litter 3	MID	10	20	260
7_DUSP6_10.5_WT_RHL	WT	Litter 3	MID	10	17	257
8_DUSP6_10.5_WT_LFL	WT	Litter 3	MID	10	19	259
8_DUSP6_10.5_WT_RFL	WT	Litter 3	MID	10	10	250
8_DUSP6_10.5_WT_RHL	WT	Litter 3	MID	10	20	260
19_DUSP6_10.5_MUT_LFL	MUT	Litter 3	MID	10	18	258
19_DUSP6_10.5_MUT_RFL	MUT	Litter 3	MID	10	17	257
19_DUSP6_10.5_MUT_LHL	MUT	Litter 3	MID	10	20	260
19_DUSP6_10.5_MUT_RHL	MUT	Litter 3	MID	10	17	257
20_DUSP6_10.5_MUT_LFL	MUT	Litter 3	MID	10	11	251
20_DUSP6_10.5_MUT_RFL	MUT	Litter 3	MID	10	8	248
20_DUSP6_10.5_MUT_LHL	MUT	Litter 3	MID	10	15	255
20_DUSP6_10.5_MUT_RHL	MUT	Litter 3	MID	10	12	252
21_DUSP6_10.5_MUT_LFL	MUT	Litter 3	MID	10	14	254
21_DUSP6_10.5_MUT_RFL	MUT	Litter 3	MID	10	16	256
21_DUSP6_10.5_MUT_LHL	MUT	Litter 3	MID	10	20	260
21_DUSP6_10.5_MUT_RHL	MUT	Litter 3	MID	10	16	256
22_DUSP6_10.5_MUT_LFL	MUT	Litter 3	MID	10	21	261
22_DUSP6_10.5_MUT_RFL	MUT	Litter 3	MID	10	7	247
22_DUSP6_10.5_MUT_LHL	MUT	Litter 3	MID	10	18	258
22_DUSP6_10.5_MUT_RHL	MUT	Litter 3	MID	10	18	258
12_DUSP6_11.5_WT_LFL	WT	Litter 4	LATE	11	15	279
12_DUSP6_11.5_WT_RFL	WT	Litter 4	LATE	11	14	278
12_DUSP6_11.5_WT_LHL	WT	Litter 4	LATE	11	15	279
12_DUSP6_11.5_WT_RHL	WT	Litter 4	LATE	11	13	277
13_DUSP6_11.5_WT_LFL	WT	Litter 4	LATE	11	10	274
13_DUSP6_11.5_WT_RFL	WT	Litter 4	LATE	11	8	272
13_DUSP6_11.5_WT_LHL	WT	Litter 4	LATE	11	13	277
13_DUSP6_11.5_WT_RHL	WT	Litter 4	LATE	11	13	277
18_DUSP6_11.5_MUT_LFL	MUT	Litter 4	LATE	11	6	270
18_DUSP6_11.5_MUT_RFL	MUT	Litter 4	LATE	11	5	269
18_DUSP6_11.5_MUT_LHL	MUT	Litter 4	LATE	10	15	255
18_DUSP6_11.5_MUT_RHL	MUT	Litter 4	LATE	11	7	271
19_DUSP6_11.5_MUT_LFL	MUT	Litter 4	LATE	11	8	272
19_DUSP6_11.5_MUT_RFL	MUT	Litter 4	LATE	11	9	273
19_DUSP6_11.5_MUT_LHL	MUT	Litter 4	LATE	11	11	275
19_DUSP6_11.5_MUT_RHL	MUT	Litter 4	LATE	11	16	280
20_DUSP6_11.5_MUT_LFL	MUT	Litter 4	LATE	11	6	270
20_DUSP6_11.5_MUT_RFL	MUT	Litter 4	LATE	11	6	270
20_DUSP6_11.5_MUT_RHL	MUT	Litter 4	LATE	11	7	271
21_DUSP6_11.5_MUT_LFL	MUT	Litter 4	LATE	11	6	270
21_DUSP6_11.5_MUT_RFL	MUT	Litter 4	LATE	11	7	271
21_DUSP6_11.5_MUT_LHL	MUT	Litter 4	LATE	11	6	270
21_DUSP6_11.5_MUT_RHL	MUT	Litter 4	LATE	11	4	268
