# Supplementary material for: Quantification of gene expression patterns to reveal the origins of abnormal morphogenesis
Source: eLife. 2018 Sep 20;7:e36405. doi: 10.7554/eLife.36405 (PMC6199133; doi:10.7554/eLife.36405)
Supplement: Figure 6—source data 1. — This Excel file contains tables with the individual scores for limb centroid size (µm) and Dusp6 volume (µm3) used to produce the graphs in (i) Figure 6A and Figure 6B; (ii) Figure 6C and Figure 6—figure supplement 1B,D; and (iii) Figure 6D and Figure 6—figure supplement 1A,C. [file elife-36405-fig6-data1.xlsx]

## Sheet: Figure 6A,Figure 6B
Id	Genotype	Limb	Developmental period	Limb centroid size	Dusp6 volume
16_DUSP6_10.5_MUT_RHL	MUT	Hindlimb	Early	2609.45	10948746
17_DUSP6_10.5_MUT_LHL	MUT	Hindlimb	Early	2462.74	19619954
17_DUSP6_10.5_MUT_RHL	MUT	Hindlimb	Early	2369.34	14769949
18_DUSP6_10.5_MUT_LHL	MUT	Hindlimb	Early	2591.53	15104663
18_DUSP6_10.5_MUT_RHL	MUT	Hindlimb	Early	2405.19	10998543
11_DUSP6_10.5_WT_LHL	WT	Hindlimb	Early	2370.92	14891317
12_DUSP6_10.5_WT_LHL	WT	Hindlimb	Early	2576.64	17034956
14_DUSP6_10.5_WT_LHL	WT	Hindlimb	Early	2403.08	15548064
9_DUSP6_10.5_WT_LHL	WT	Hindlimb	Early	2284.96	12180373
14_DUSP6_11.5_MUT_RHL	MUT	Hindlimb	Early	2365.88	16035606
16_DUSP6_11.5_MUT_LHL	MUT	Hindlimb	Early	2870.41	15137890
17_DUSP6_11.5_MUT_LHL	MUT	Hindlimb	Early	2298.94	20113916
17_DUSP6_11.5_MUT_RHL	MUT	Hindlimb	Early	2433.08	23772352
11_DUSP6_11.5_WT_LHL	WT	Hindlimb	Early	2204.98	19089552
8_DUSP6_11.5_WT_LHL	WT	Hindlimb	Early	2254.01	12367783
8_DUSP6_11.5_WT_RHL	WT	Hindlimb	Early	2043.27	13899761
9_DUSP6_11.5_WT_LHL	WT	Hindlimb	Early	2232.65	12836979
9_DUSP6_11.5_WT_RHL	WT	Hindlimb	Early	2152.74	28798138
20_DUSP6_10.5_MUT_LHL	MUT	Hindlimb	Mid early	2565.08	21798426
20_DUSP6_10.5_MUT_RHL	MUT	Hindlimb	Mid early	2445.82	17105952
21_DUSP6_10.5_MUT_LHL	MUT	Hindlimb	Mid early	2758.95	30489530
5_DUSP6_10.5_WT_LHL	WT	Hindlimb	Mid early	2754.08	25772804
6_DUSP6_10.5_WT_LHL	WT	Hindlimb	Mid early	2859.26	21344280
7_DUSP6_10.5_WT_LHL	WT	Hindlimb	Mid early	2695.2	24644086
19_DUSP6_10.5_MUT_RFL	MUT	Forelimb	Mid Late	2669.29	25226902
20_DUSP6_10.5_MUT_LFL	MUT	Forelimb	Mid Late	2303.38	31622990
20_DUSP6_10.5_MUT_RFL	MUT	Forelimb	Mid Late	2408.87	19645938
21_DUSP6_10.5_MUT_LFL	MUT	Forelimb	Mid Late	2577.87	33271252
21_DUSP6_10.5_MUT_RFL	MUT	Forelimb	Mid Late	2740.32	26497300
22_DUSP6_10.5_MUT_RFL	MUT	Forelimb	Mid Late	2778.4	28333074
5_DUSP6_10.5_WT_LFL	WT	Forelimb	Mid Late	2715.39	20562374
5_DUSP6_10.5_WT_RFL	WT	Forelimb	Mid Late	2828.3	18331396
6_DUSP6_10.5_WT_LFL	WT	Forelimb	Mid Late	2686.63	23416642
6_DUSP6_10.5_WT_RFL	WT	Forelimb	Mid Late	2825.38	20497790
7_DUSP6_10.5_WT_LFL	WT	Forelimb	Mid Late	2519.04	25068440
7_DUSP6_10.5_WT_RFL	WT	Forelimb	Mid Late	2714.64	22771016
8_DUSP6_10.5_WT_LFL	WT	Forelimb	Mid Late	2808.29	30367782
18_DUSP6_11.5_MUT_LFL	MUT	Forelimb	Late	3070.75	31948080
18_DUSP6_11.5_MUT_RFL	MUT	Forelimb	Late	3092.36	30861382
19_DUSP6_11.5_MUT_LFL	MUT	Forelimb	Late	3262.86	27916828
19_DUSP6_11.5_MUT_RFL	MUT	Forelimb	Late	3202.99	22463966
20_DUSP6_11.5_MUT_LFL	MUT	Forelimb	Late	3065.83	34840248
20_DUSP6_11.5_MUT_RFL	MUT	Forelimb	Late	3057.47	26411366
21_DUSP6_11.5_MUT_LFL	MUT	Forelimb	Late	3008.16	36474324
21_DUSP6_11.5_MUT_RFL	MUT	Forelimb	Late	3021.37	28088236
12_DUSP6_11.5_WT_LFL	WT	Forelimb	Late	3413.44	27228656
12_DUSP6_11.5_WT_RFL	WT	Forelimb	Late	3354.51	26581430
13_DUSP6_11.5_WT_LFL	WT	Forelimb	Late	3173.95	21942372
13_DUSP6_11.5_WT_RFL	WT	Forelimb	Late	3304.73	23417812

## Sheet: Figure 6C, Figure 6 supplement1
Id	Genotype	Developmental period	Limb centroid size	Dusp6 volume
15_DUSP6_10.5_MUT_LFL	MUT	EARLY	2262.05	12730460
16_DUSP6_10.5_MUT_LFL	MUT	EARLY	2220.52	18131898
16_DUSP6_10.5_MUT_RFL	MUT	EARLY	2298.19	17571438
17_DUSP6_10.5_MUT_LFL	MUT	EARLY	2301.9	19373578
17_DUSP6_10.5_MUT_RFL	MUT	EARLY	2324.88	21350198
18_DUSP6_10.5_MUT_RFL	MUT	EARLY	2237.35	21165862
11_DUSP6_10.5_WT_LFL	WT	EARLY	2126.12	17613380
11_DUSP6_10.5_WT_RFL	WT	EARLY	2074.98	20434064
12_DUSP6_10.5_WT_RFL	WT	EARLY	2217.45	27884402
14_DUSP6_10.5_WT_LFL	WT	EARLY	2140.83	16582915
14_DUSP6_10.5_WT_RFL	WT	EARLY	2233.58	24764926
9_DUSP6_10.5_WT_LFL	WT	EARLY	2029.95	12523838
9_DUSP6_10.5_WT_RFL	WT	EARLY	1993.69	12069008
10_DUSP6_11.5_WT_LFL	WT	EARLY	1987.78	18275384
10_DUSP6_11.5_WT_RFL	WT	EARLY	2005.41	16866946
11_DUSP6_11.5_WT_LFL	WT	EARLY	2117.49	19167196
11_DUSP6_11.5_WT_RFL	WT	EARLY	1998.92	21955720
8_DUSP6_11.5_WT_LFL	WT	EARLY	1929.64	17497394
8_DUSP6_11.5_WT_RFL	WT	EARLY	2035.85	18884704
9_DUSP6_11.5_WT_LFL	WT	EARLY	1881.45	12214441
9_DUSP6_11.5_WT_RFL	WT	EARLY	1851.23	15676482
19_DUSP6_10.5_MUT_RFL	MUT	MID	2669.29	25226902
20_DUSP6_10.5_MUT_LFL	MUT	MID	2303.38	31622990
20_DUSP6_10.5_MUT_RFL	MUT	MID	2408.87	19645938
21_DUSP6_10.5_MUT_LFL	MUT	MID	2577.87	33271252
21_DUSP6_10.5_MUT_RFL	MUT	MID	2740.32	26497300
22_DUSP6_10.5_MUT_RFL	MUT	MID	2778.4	28333074
5_DUSP6_10.5_WT_LFL	WT	MID	2715.39	20562374
5_DUSP6_10.5_WT_RFL	WT	MID	2828.3	18331396
6_DUSP6_10.5_WT_LFL	WT	MID	2686.63	23416642
6_DUSP6_10.5_WT_RFL	WT	MID	2825.38	20497790
7_DUSP6_10.5_WT_LFL	WT	MID	2519.04	25068440
7_DUSP6_10.5_WT_RFL	WT	MID	2714.64	22771016
8_DUSP6_10.5_WT_LFL	WT	MID	2808.29	30367782
18_DUSP6_11.5_MUT_LFL	MUT	LATE	3070.75	31948080
18_DUSP6_11.5_MUT_RFL	MUT	LATE	3092.36	30861382
19_DUSP6_11.5_MUT_LFL	MUT	LATE	3262.86	27916828
19_DUSP6_11.5_MUT_RFL	MUT	LATE	3202.99	22463966
20_DUSP6_11.5_MUT_LFL	MUT	LATE	3065.83	34840248
20_DUSP6_11.5_MUT_RFL	MUT	LATE	3057.47	26411366
21_DUSP6_11.5_MUT_LFL	MUT	LATE	3008.16	36474324
21_DUSP6_11.5_MUT_RFL	MUT	LATE	3021.37	28088236
12_DUSP6_11.5_WT_LFL	WT	LATE	3413.44	27228656
12_DUSP6_11.5_WT_RFL	WT	LATE	3354.51	26581430
13_DUSP6_11.5_WT_LFL	WT	LATE	3173.95	21942372
13_DUSP6_11.5_WT_RFL	WT	LATE	3304.73	23417812

## Sheet: Figure 6D, Figure 6 supplement1
Id	Genotype	Developmental period	Limb centroid size	Dusp6 volume
16_DUSP6_10.5_MUT_RHL	MUT	EARLY	2609.45	10948746
17_DUSP6_10.5_MUT_LHL	MUT	EARLY	2462.74	19619954
17_DUSP6_10.5_MUT_RHL	MUT	EARLY	2369.34	14769949
18_DUSP6_10.5_MUT_LHL	MUT	EARLY	2591.53	15104663
18_DUSP6_10.5_MUT_RHL	MUT	EARLY	2405.19	10998543
14_DUSP6_11.5_MUT_RHL	MUT	EARLY	2365.88	16035606
16_DUSP6_11.5_MUT_LHL	MUT	EARLY	2870.41	15137890
17_DUSP6_11.5_MUT_LHL	MUT	EARLY	2298.94	20113916
17_DUSP6_11.5_MUT_RHL	MUT	EARLY	2433.08	23772352
11_DUSP6_10.5_WT_LHL	WT	EARLY	2370.92	14891317
12_DUSP6_10.5_WT_LHL	WT	EARLY	2576.64	17034956
14_DUSP6_10.5_WT_LHL	WT	EARLY	2403.08	15548064
9_DUSP6_10.5_WT_LHL	WT	EARLY	2284.96	12180373
11_DUSP6_11.5_WT_LHL	WT	EARLY	2204.98	19089552
8_DUSP6_11.5_WT_LHL	WT	EARLY	2254.01	12367783
8_DUSP6_11.5_WT_RHL	WT	EARLY	2043.27	13899761
9_DUSP6_11.5_WT_LHL	WT	EARLY	2232.65	12836979
9_DUSP6_11.5_WT_RHL	WT	EARLY	2152.74	28798138
20_DUSP6_10.5_MUT_LHL	MUT	MID	2565.08	21798426
20_DUSP6_10.5_MUT_RHL	MUT	MID	2445.82	17105952
21_DUSP6_10.5_MUT_LHL	MUT	MID	2758.95	30489530
5_DUSP6_10.5_WT_LHL	WT	MID	2754.08	25772804
6_DUSP6_10.5_WT_LHL	WT	MID	2859.26	21344280
7_DUSP6_10.5_WT_LHL	WT	MID	2695.2	24644086
18_DUSP6_11.5_MUT_LHL	MUT	LATE	2888.77	49018320
18_DUSP6_11.5_MUT_RHL	MUT	LATE	2953.75	47237152
19_DUSP6_11.5_MUT_LHL	MUT	LATE	3076.57	37654252
19_DUSP6_11.5_MUT_RHL	MUT	LATE	3074.58	57297636
20_DUSP6_11.5_MUT_RHL	MUT	LATE	2943.98	40978296
21_DUSP6_11.5_MUT_RHL	MUT	LATE	2797.82	41465204
12_DUSP6_11.5_WT_LHL	WT	LATE	3290.93	42118576
12_DUSP6_11.5_WT_RHL	WT	LATE	3267.64	43659028
13_DUSP6_11.5_WT_LHL	WT	LATE	3130.57	57082780
13_DUSP6_11.5_WT_RHL	WT	LATE	3075.34	24350922
